# Supplementary material for: Burden of Disease Caused by Otitis Media: Systematic Review and Global Estimates
Source: PLOS journal article supplement (doi:10.1371/journal.pone.0036226), 2012-04-30

**Figure S2. Sequelae of OM, simplified scheme**

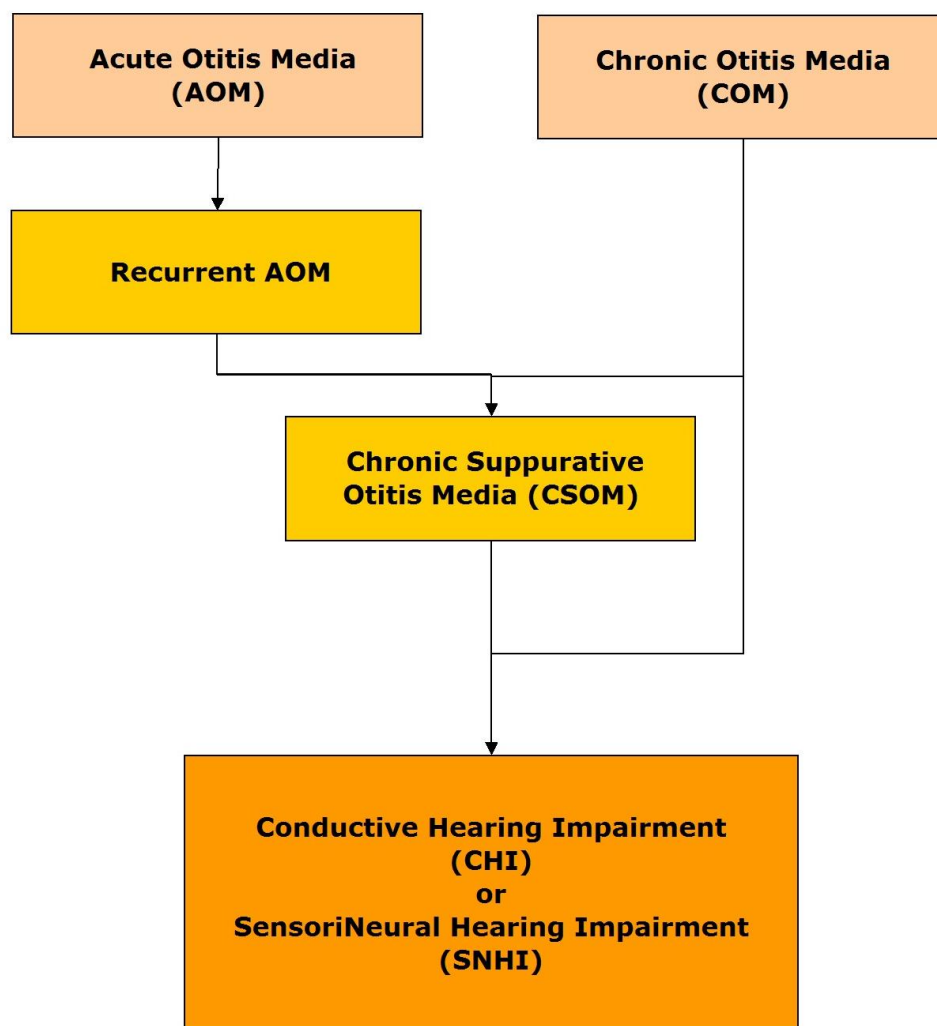

Supplement: S2 (10.1371/journal.pone.0036226.s002) [file journal.pone.0036226.s002]
