# Supplementary material for: Burden of Disease Caused by Otitis Media: Systematic Review and Global Estimates
Source: PLOS journal article supplement (doi:10.1371/journal.pone.0036226), 2012-04-30

Figure S3. 1<sup>st</sup> screening by titles, abstract and keywords

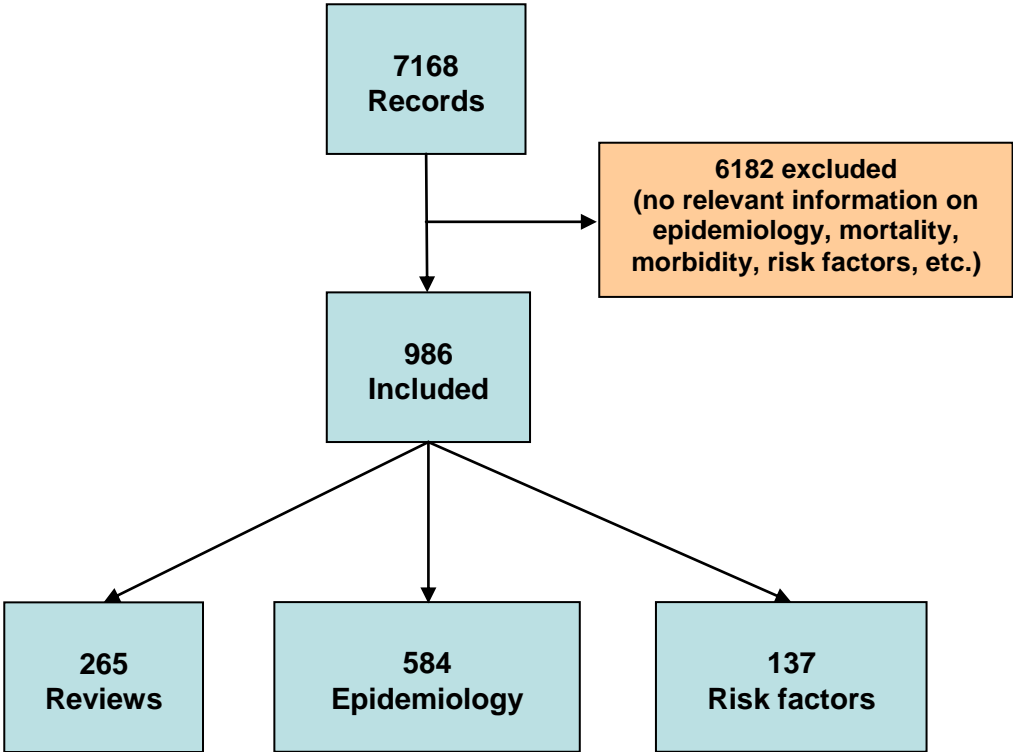

Supplement: S3 (10.1371/journal.pone.0036226.s003) [file journal.pone.0036226.s003]
