# Supplementary material for: Burden of Disease Caused by Otitis Media: Systematic Review and Global Estimates
Source: PLOS journal article supplement (doi:10.1371/journal.pone.0036226), 2012-04-30

Figure S4. Risk factors diagram

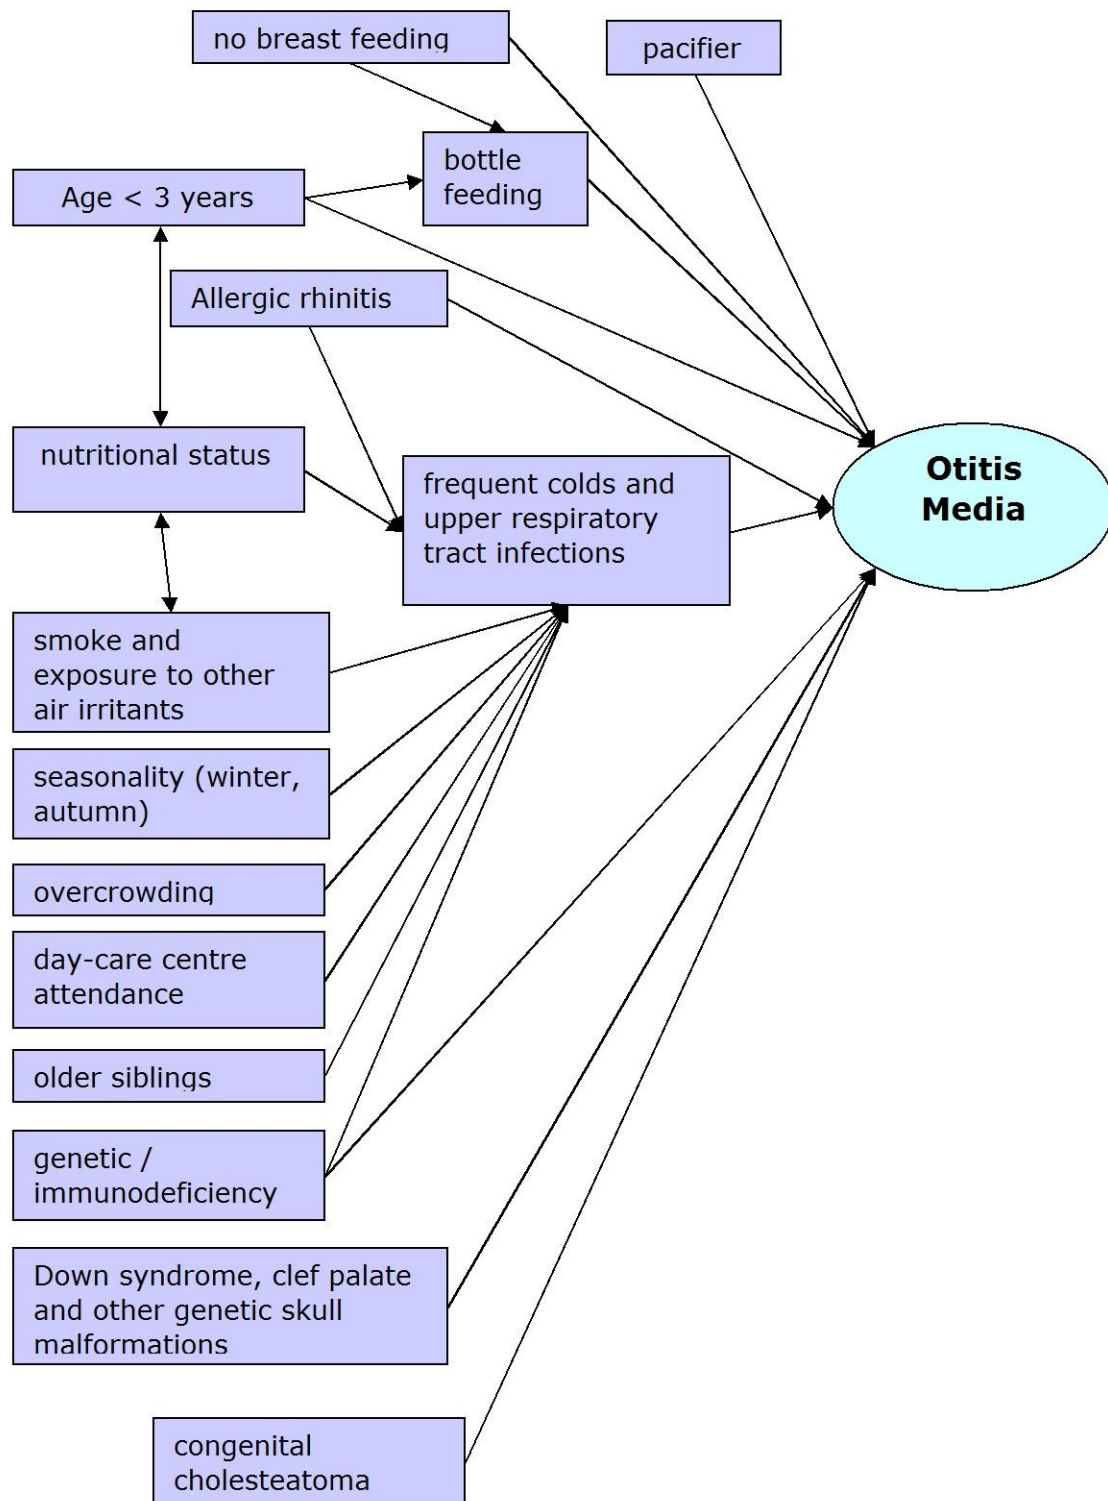

Supplement: S4 (10.1371/journal.pone.0036226.s004) [file journal.pone.0036226.s004]
